# Supplementary material for: Exome sequencing identifies germline variants in DIS3 in familial multiple myeloma
Source: PubMed Central journal article supplement (PMC6756025; doi:10.1038/s41375-019-0452-6), 2019-04-09
Supplement: 41375_2019_452_MOESM1_ESM.pdf [file 41375_2019_452_MOESM1_ESM.pdf]

1 **SUPPLEMENTARY APPENDIX**

2  
3 *Supplementary Methods*

4  
5  
6 *Supplementary Tables*

7  
8 **Table S1.** Family characteristics.

9  
10 **Table S2.** Clinical characteristics of *DIS3* mutation carriers among familial and sporadic  
11 MM cases.

12  
13 **Table S3.** Selected significant GO and REACTOME categories (q-value < 0.05, NES >  
14 0.5) enriched in carriers of *DIS3* likely deleterious variants (germline, somatic).  
15 *originalGeneSetSize*: GO/REACTOME term size from MSigDB, *actualGeneSetSize*: size  
16 of the genes from the GO/REACTOME term found in the dataset, *NES*: Normalized  
17 Enrichment Score.

18  
19 **Table S4.** Mann-Whitney-Wilcoxon Gene Set Test (MWW-GST) analysis of GO and  
20 REACTOME categories. **(a,b)** Significant GO and REACTOME categories (q-value <  
21 0.05 and NES > 0.5) enriched in carriers of germline likely deleterious *DIS3* variants  
22 (*n*=21) from the Mann-Whitney-Wilcoxon-GST enrichment analysis. **(c,d)** Significant GO  
23 and REACTOME categories (q-value < 0.05 and NES > 0.5) enriched in carriers of somatic  
24 likely deleterious *DIS3* variants (*n*=96) from the Mann-Whitney-Wilcoxon-GST  
25 enrichment analysis. *originalGeneSetSize* is the GO term size from MSigDB;  
26 *actualGeneSetSize* is the size of the genes from the GO term found in the dataset; *NES* is  
27 the Normalized Enrichment Score.

28 **Table S5.** Ranked gene list from **(a)** 21 carriers of germline likely deleterious *DIS3*  
29 variants versus 655 non-carriers and **(b)** 96 carriers of somatic likely deleterious *DIS3*  
30 variants versus 655 non-carriers. ee-MWW-score is the score associated to each gene  
31 resulting from the ee-MWW procedure.

32  
33 **Table S6.** Characteristics of MM cases and controls from the IMMEnSE consortium.

34  
35  
36 *Supplementary Figures*

37 **Figure S1.** IGV plots and Sanger sequencing chromatograms showing the identified *DIS3*  
38 variants: **(A)** c.1755+1G>T, **(B)** c.2875T>C (p.\*959Glnext\*14) and **(C)** c.1883+1G>C.  
39 Median Variant Allele Frequency (VAF), where available, is shown for each variant.

40  
41 **Figure S2.** Quantile-quantile plots of gene-based burden tests for **(a)** rare neutral  
42 synonymous variants and **(b)** rare predicted deleterious variants across genes assessed by

43 WES. Lambda statistics are shown on the plots. Logistic regression, with adjustment for  
44 ancestry inferred by genotype, was used to test for association between burden with  
45 individuals being defined as exposed if they carry one (or more) variants (synonymous or  
46 deleterious).

47  
48 **Figure S3.** Mutation burden test and transcriptome analysis in carriers of *DIS3* variants.  
49 **(a)** Burden test association results for MM cases and controls carrying *DIS3* germline likely  
50 deleterious variants. OR is adjusted for ancestry inferred by genotype. **(b)** ee-MWW  
51 enrichment plots for selected significantly enriched GO and REACTOME pathways  
52 among carriers of germline likely deleterious *DIS3* variants (GO pathway Translational  
53 Termination, GO pathway ncRNA Processing, GO pathway ncRNA metabolic process and  
54 REACTOME pathway Metabolism of RNA). NES and q-values are indicated. Marked in  
55 red are genes involved in the respective pathways relative to other genes (in grey).

56  
57

58

59

60

61

62

63

64

65

66

67

68

69

70

71

72

73 **Supplementary Methods**

74

75 **Study population (MM/MGUS families)**

76

77 Families with at least two cases of dysglobulinemia (defined as MGUS or MM) were clinically  
78 identified through the Intergroupe Francophone du Myélome (IFM), a large cooperative group  
79 with >100 centres in France, Belgium and Switzerland. The study was approved by the Hospices  
80 Civils de Lyon institutional review board and participants signed an informed consent form.

81 The recruitment of eligible families started in October 2007, and as of December 2015, 154  
82 non-related families with MM and/or MGUS were enrolled in the study and a total of 937  
83 peripheral blood samples obtained. Diagnosis of MM and MGUS was based on Serum Protein  
84 Electrophoresis (SPE) and Immunoelectrophoresis. The majority of recruited families were of  
85 European descent, while five families (5/154, 3.2%) originated from the Caribbean island of  
86 Martinique. Lymphoblastoid cell lines were established for a subset of 865 samples as previously  
87 described<sup>1</sup>. The median number of cases of dysglobulinemia within these families was 2.0 (range  
88 2-6). From the 240 MM and 153 MGUS cases identified in the pedigrees, only 148 and 139 were  
89 available for blood sampling, respectively. Additionally, samples from six cases of Waldenström  
90 Macroglobulinemia (WM), one case of light chain amyloidosis, one case of lymphoma, as well as  
91 642 unaffected relatives were obtained. Two MM cases were also affected with amyloidosis, and  
92 two MGUS patients were affected with lymphoma and Chronic Lymphocytic Leukemia (CLL),  
93 respectively. The mean age at recruitment was 66.0 years (range 39-91) for MM cases and 65.4  
94 years (range 35-90) for MGUS patients. The gender ratio (male/female) for MM and MGUS were  
95 1.08 and 0.86, respectively. Family characteristics are shown in **Supplementary table S1**.

96 Whole exome sequencing was performed on a subgroup of 25 MM, 40 MGUS and 1 WM  
97 cases from 23 non-related families with more than two cases of MM and/or MGUS and available  
98 material from most of the cases. Additionally, using a targeted resequencing approach we screened  
99 937 samples available from our selection of 154 unrelated families, including 148 MM, 139  
100 MGUS, as well as 642 unaffected family members, and eight individuals with another  
101 hematological condition.

102

103

104 **Whole exome sequencing (WES) and targeted resequencing applications, validation of**  
105 **sequencing variants**

106

107 DNA from whole blood (n=72) or lymphoblastoid cell lines (LCLs, after 1 to 9 *in vitro* passages  
108 n=865)) was extracted using the QIAmp DNA Mini Kit (Qiagen) and quantified with the Qubit  
109 dsDNA BR Assay kit (Thermofischer Scientific).

110 Germline DNA (1 µg) extracted from whole blood (n=1) and from LCLs after 8 (n=1) and  
111 9 (n=64) passages *in vitro* was used for whole-exome sequence capture using the TruSeq™ Exome  
112 Enrichment Kit (Illumina). Pooled libraries were paired-end sequenced (2x100 reads) using the  
113 TruSeq™ SBS Kit version 3 on an Illumina HiSeq 2500 (Illumina). Image analysis and base  
114 calling was performed with the Illumina RTA software version 1.13.48.

115 Targeted resequencing of the *DIS3* coding region was performed using a GeneRead  
116 DNaseq Custom Panel (QIAGEN), according to the manufacturer's recommendations. The  
117 amplicon library was prepared using the NEBNext® Fast DNA Library Prep Set for Ion Torrent™  
118 (New England Biolabs) with custom Ion Xpress Barcode adapters (1-384). Barcoded libraries were  
119 quantified (Qubit®) and pooled equimolarly, gel extracted and quantified on a Bioanalyzer High  
120 Sensitivity DNA Kit (Agilent technologies). Template preparation by emulsion PCR was  
121 performed using the Ion PI Template OT2 200 kit v3 and Ion One Touch 2 system (Thermofischer  
122 Scientific) and the positive Ion Sphere™ particles (ISP) were isolated on the Ion OneTouch™ ES  
123 module. Templated ISPs were sequenced on an Ion PI™ Chip Kit v2 using the Ion PI™  
124 Sequencing 200 Kit v3 on the Ion Proton™ System (ThermoFisher scientific). The targeted capture  
125 covered 98% of *DIS3* coding sequence, with a median coverage of 151X (117X-189X). *DIS3*  
126 variants identified by WES and targeted sequencing were technically validated using Sanger  
127 sequencing on an independent PCR amplification on DNA extracted from uncultured whole blood.

128

129

130 **Data analysis and variant filtering**

131

132 Alignment of WES raw data on the reference human genome (hg19) was performed using  
133 Burrows-Wheeler Aligner (BWA)<sup>2</sup> and sorted with Picard SortSam (<http://picard.sourceforge.net>),

134 while duplicate reads were flagged by Picard MarkDuplicates. The Genome Analysis Toolkit  
135 (GATK)<sup>3-5</sup> was used for local realignment and base score recalibration of the output files before  
136 variant calling. Single nucleotide variants (SNV) and indels were called using GATK  
137 UnifiedGenotyper. Variants were subsequently annotated with AnnoVar (version 2013, Aug 23)<sup>6</sup>  
138 to describe the frequency of variants in different populations, their position related to genes, if they  
139 are likely to result in a coding sequence change and its predicted severity (including assessment of  
140 various *in silico* scores for missense variants) and other related attributes. All variants that did not  
141 fulfil our quality control criteria (call quality, coding variant, strand bias, segmental duplications,  
142 presence of different starting point of reads for the variant allele), along with those reported in  
143 public databases (NHLBI GO Exome Sequencing Project (ESP6500)<sup>7</sup>, 1000 genomes project<sup>8</sup>),  
144 and in a panel of 500 germline TCGA<sup>9</sup> samples at a frequency above 1%, were filtered out. Finally,  
145 we only further considered variants that were shared by the majority of affected members within  
146 a given family.

147 Alignment of targeted resequencing reads to the reference genome (hg19) and base calling  
148 was performed using Torrent Suite software v3.6.2 (ThermoFischer Scientific). Identification of  
149 sequence variants was facilitated using FreeBayes<sup>10</sup> and annotated as described above.

150

151

## 152 **Inhibition of Nonsense-Mediated mRNA Decay by puromycin treatment**

153

154 Lymphoblastoid cell lines (LCLs) from individuals N48 and O53 (family A) and E18 and E28  
155 (family B), heterozygous for the variants of interest, were split evenly in 2 subcultures and one of  
156 them was treated with puromycin at a concentration of 100ug/ml (Sigma). Puromycin is a protein  
157 synthesis inhibitor that enriches for transcripts harboring a premature stop codon (PTC) through  
158 inhibiting their degradation by nonsense-mediated mRNA decay (NMD). After 6 hours of  
159 incubation, cells from both treated and untreated subcultures were harvested and total RNA was  
160 isolated using the RNeasy Kit (Qiagen). cDNA synthesis was performed using the Superscript III  
161 First-strand Synthesis System for RT-PCR (Invitrogen) using oligo-dT primers. *DIS3* exons 10-16  
162 were amplified using specific primers located within exonic regions (ex10F: 5'-  
163 AGAAGACCTGAGGCATCTGTG-3', ex16R: 5'-GAGCAGGATGTTTTCGAAGC-3'), and  
164 PCR products were analysed by direct Sanger sequencing.

165

166

### 167 **Quantitative real-time PCR**

168

169 Total RNA was purified from LCLs for two carriers of the c.1755+1G>T splicing variant (E18,  
170 E28), one carrier of the p.\*959Glnext\*14 stop-loss variant (O53), and four non-carriers (E17, E37,  
171 N48 and Q13) from families A, B and D (**Figure 1a**) using the RNeasy mini kit (Qiagen). cDNA  
172 was generated using the Omniscript cDNA synthesis kit (Qiagen) and random hexamers.  
173 Quantitative PCR (qPCR) was carried out using TaqMan probe-based chemistry on a StepOnePlus  
174 Real-Time PCR system (Thermofischer Scientific); Hs00209014\_m1 for *DIS3* and  
175 Hs02758991\_g1 for *GAPDH* as endogenous control. Amplification reactions were performed in  
176 triplicates, and data were collected and analysed using the StepOne™Real-Time PCR Software  
177 v2.0. The relative quantification in gene expression was determined using the  $\Delta\Delta C_t$  method.

178

179

### 180 **Western blot**

181

182 Cells from a carrier of the p.\*959Glnext\*14 stop-loss variant (O53) and 2 non-carriers were lysed  
183 with RIPA buffer supplemented with protease inhibitor cocktail. Western blot was performed  
184 using 30  $\mu$ g of protein and primary antibodies against *DIS3* (PA558723, Thermofischer scientific)  
185 at 1:150 dilution and *GAPDH* (6C5, Santa Cruz Biotechnology) at 1:3000 dilution. HRP-  
186 conjugated anti-rabbit and anti-mouse secondary antibodies (GE Healthcare) were respectively  
187 used at 1:3000 dilution. Immunoreactive proteins were visualized using the Clarity ECL kit on a  
188 ChemiDoc XRS+ system (Bio-Rad). Calculations were made using BioRad's Image Lab software  
189 v 5.2.

190

191

### 192 **Replication study and Mutation Burden Analysis**

193

194 Germline WES data from sporadic MM cases (study accession phs000348 and phs000748)  
195 (MMRF CoMMpass Study) and controls (study accession phs000209, phs000276, phs000296,

196 phs000298, phs000424, phs000654, phs000687, phs000806 and phs000878) were obtained from  
197 dbGaP. After removing related individuals and restricting to individuals of European origin by  
198 principal components analysis (PCA) of common variants, 781 cases and 3534 controls were  
199 further analysed. Exomes were jointly called as previously described<sup>11,12</sup>. We focused on rare  
200 germline variants (MAF<0.01) in both cases and controls.  
201 For mutation burden testing, loss-of-function (frameshift insertion or deletion, stop-gain, stop-loss,  
202 splice-site change) and missense variants with Phred CADD (Combined Annotation Dependent  
203 Depletion) score  $\geq 20$  were used. For neutral synonymous variant testing, synonymous variants  
204 with MAF  $\leq 0.01$  were used. The sum of predicted deleterious variants or neutral synonymous  
205 coding variant carriers for each gene in MM cases and controls were compared using logistic  
206 regression. To eliminate potential spurious associations due to population stratification, we used  
207 the first three PCs derived from the PCA testing as covariates in the logistic regression test.  
208 Logistic regression and lambda statistics were implemented using R package stats version 3.3.2.  
209 We first tested for systemic bias in this dataset by testing for burden association tests based on  
210 synonymous variants in genes across the genome. These burden test statistics, not expected to be  
211 associated with MM, were consistent with that expected by chance ((genomic inflation ( $\lambda$ ) =  
212 0.998)) (**Supplementary Figure S2**).

213

214

## 215 **SNP genotyping**

216

217 The rare *DIS3* stop-loss variant p.\*959Gln (rs141067458) was genotyped in 3020 sporadic MM  
218 cases and 1786 controls from seven European countries (Denmark, France, Hungary, Italy, Poland,  
219 Portugal, and Spain) and Israel from the International Multiple Myeloma rESEarch (IMMEnSE)  
220 Consortium. The characteristics of IMMEnSE cases and controls are shown in **Supplementary**  
221 **table S6**. Genotyping was performed using the KASPar® PCR SNP genotyping system  
222 (KBioscience) with a call rate of >84%. Eight percent of the samples were duplicated for quality  
223 control and the genotypes showed >99% concordance. Genotype distributions in controls  
224 respected Hardy-Weinberg equilibrium. To facilitate the genotyping of this rare variant,  
225 established heterozygote variant carriers were included in each genotyping plate, and heterozygote  
226 samples were resolved relative to the position of the known samples. Ambiguous samples were

227 classified as “unknown” and excluded. Genotypes were assigned with the operator blinded to case  
228 control status in order to minimize the risk of bias due to technical reasons. Association with MM  
229 risk was assessed using unconditional logistic regression adjusting for country of origin (study),  
230 age and sex. *P*-values were two sided.

231  
232

### 233 **Transcriptome analysis**

234

235 WES data on both germline and tumor material were used to determine carriers of *DIS3* variants  
236 prior to transcriptome analysis. Transcriptome analysis of MMRF CoMMpass MM tumor  
237 transcriptomes from carriers of germline likely deleterious *DIS3* variants (n=21), somatic *DIS3*  
238 carriers (n=96) and non-carriers (n=655) was performed using the ee-MWW method as previously  
239 described<sup>13</sup> and obtained an enrichment score (ES) for each gene. Pathway enrichment analysis  
240 was performed using GO Biological Process and REACTOME gene sets ontologies. Pathways  
241 with *q*-value < 0.05 and normalized enrichment score (NES) > 0.5 were considered significant.

242  
243  
244  
245  
246  
247  
248  
249  
250  
251  
252  
253  
254  
255  
256  
257  
258  
259



262 **Table S1.** Family characteristics

|                                           |                 |
|-------------------------------------------|-----------------|
| <b><i>Nb of families</i></b>              | <b>154</b>      |
| only MM ( $N \geq 2$ )                    | 63 <sup>a</sup> |
| only MGUS ( $N \geq 2$ )                  | 19 <sup>b</sup> |
| MM ( $N \geq 1$ ) and MGUS ( $N \geq 1$ ) | 72 <sup>c</sup> |
| <b><i>MM cases</i></b>                    | <b>240</b>      |
| <b>Available</b>                          | 148             |
| - Male                                    | 77              |
| - Female                                  | 71              |
| <b>Mean age at inclusion</b>              |                 |
| - Male                                    | 64.8 (39-91)    |
| - Female                                  | 67.3 (45-87)    |
| <b>Heavy chain</b>                        |                 |
| - IgA                                     | 22              |
| - IgG                                     | 91              |
| - n/a                                     | 35              |
| <b>Light chain</b>                        |                 |
| - kappa                                   | 93              |
| - lambda                                  | 35              |
| - kappa/lambda                            | 2               |
| - n/a                                     | 18              |
| <b><i>MGUS cases</i></b>                  | <b>153</b>      |
| <b>Available</b>                          | 139             |
| - Male                                    | 65              |
| - Female                                  | 74              |
| <b>Mean age at inclusion</b>              |                 |
| - Male                                    | 65.1 (38-90)    |
| - Female                                  | 65.6 (35-88)    |
| <b>Heavy chain</b>                        |                 |
| - IgA                                     | 16              |
| - IgG                                     | 85              |
| - IgA/IgG                                 | 3               |
| - IgM                                     | 24              |
| - IgM/IgG                                 | 1               |
| - n/a                                     | 10              |
| <b>Light chain</b>                        |                 |
| - kappa                                   | 74              |
| - lambda                                  | 50              |
| - kappa/lambda                            | 4               |
| - n/a                                     | 11              |

<sup>a</sup> One case of amyloidosis was detected within MM only families.

<sup>b</sup> Six cases of WM were identified within MGUS only families.

<sup>c</sup> One lymphoma case was identified in families with both MM and MGUS cases.

265  
266  
267

**Table S2.** Clinical characteristics of *DIS3* mutation carriers among familial and sporadic MM cases.

| <i>Sample</i>                                             | <i>DIS3 variant</i>        | <i>Diagnosis</i> | <i>Age of onset</i> | <i>Family history (Cancers)</i>                 | <i>Heavy chain</i> | <i>Light chain</i> |
|-----------------------------------------------------------|----------------------------|------------------|---------------------|-------------------------------------------------|--------------------|--------------------|
| <b><i>Familial MM cases (n=7)</i></b>                     |                            |                  |                     |                                                 |                    |                    |
| O29_family A                                              | c.2875T>C; p.*959Glnext*14 | MM               | 60 <sup>a</sup>     | Yes ( <i>MM, MGUS</i> )                         | IgG                | kappa              |
| M63_family A                                              | c.2875T>C; p.*959Glnext*14 | MGUS             | 77 <sup>a</sup>     | Yes ( <i>MM, MGUS</i> )                         | IgG                | kappa, lambda      |
| O53_family A                                              | c.2875T>C; p.*959Glnext*14 | MGUS             | 75 <sup>a</sup>     | Yes ( <i>MM, MGUS</i> )                         | IgG                | kappa              |
| E18_family B                                              | c.1755+1G>T                | MM               | 39 <sup>a</sup>     | Yes ( <i>MM, MGUS</i> )                         | IgG                | kappa              |
| E28_family B                                              | c.1755+1G>T                | MGUS             | 52 <sup>a</sup>     | Yes ( <i>MM, MGUS</i> )                         | IgM                | kappa              |
| Q64_family C                                              | c.1883+1G>C                | MM               | 47 <sup>a</sup>     | Yes ( <i>MM, amyloidosis</i> )                  | n/a                | n/a                |
| Q39_family D                                              | c.2875T>C; p.*959Glnext*14 | MM               | 78 <sup>a</sup>     | Yes ( <i>MM</i> )                               | n/a                | n/a                |
| <b><i>MMRF CoMMpass germline DIS3 carriers (n=30)</i></b> |                            |                  |                     |                                                 |                    |                    |
| MMRC0318                                                  | c.376G>A; p.Glu126Lys      | MM               | n/a                 | n/a                                             | n/a                | n/a                |
| MMRC0499                                                  | c.487dupA; p.Met163fs      | MM               | n/a                 | n/a                                             | n/a                | n/a                |
| MMRC0588                                                  | c.487dupA; p.Met163fs      | MM               | n/a                 | n/a                                             | n/a                | n/a                |
| MMRF_2401                                                 | c.628C>G; p.Arg210Gly      | MM               | 64                  | Unknown                                         | n/a                | n/a                |
| MMRF_1659                                                 | c.974A>G; p.Glu325Gly      | MM               | n/a                 | n/a                                             | n/a                | n/a                |
| MMRC0461                                                  | c.1198G>A; p.Val400Ile     | MM               | n/a                 | n/a                                             | n/a                | n/a                |
| MMRC0337                                                  | c.1202C>T; p.Ala401Val     | MM               | n/a                 | n/a                                             | n/a                | n/a                |
| MMRF_1167                                                 | c.1202C>T; p.Ala401Val     | MM               | 74                  | Unknown                                         | n/a                | n/a                |
| MMRF_1677                                                 | c.1202C>T; p.Ala401Val     | MM               | 50                  | Unknown                                         | n/a                | n/a                |
| MMRF_1808                                                 | c.1202C>T; p.Ala401Val     | MM               | 56                  | Unknown                                         | n/a                | n/a                |
| MMRC0543                                                  | c.1354C>G; p.Leu452Val     | MM               | n/a                 | n/a                                             | n/a                | n/a                |
| MMRF_2611                                                 | c.1457T>C; p.Ile486Thr     | MM               | 66                  | Yes ( <i>Lung</i> )                             | n/a                | n/a                |
| MMRF_1900                                                 | c.1552G>A; p.Ala518Thr     | MM               | 77                  | Yes ( <i>Lung, Prostate, Gynecological Ca</i> ) | n/a                | n/a                |

|           |                            |    |     |                                               |     |     |
|-----------|----------------------------|----|-----|-----------------------------------------------|-----|-----|
| MMRF_2326 | c.1597T>C; p.Cys533Arg     | MM | 72  | No                                            | n/a | n/a |
| MMRF_1865 | c.1766C>T; p.Thr589Met     | MM | 56  | No                                            | n/a | n/a |
| MMRF_1547 | c.1945A>G; p.Ile649Val     | MM | 65  | Yes ( <i>Colorectal</i> )                     | n/a | n/a |
| MMRF_1816 | c.2254G>C; p.Val752Leu     | MM | 66  | No                                            | n/a | n/a |
| MMRF_1309 | c.2485C>T; p.Arg829Cys     | MM | n/a | n/a                                           | n/a | n/a |
| MMRF_1768 | c.2485C>T; p.Arg829Cys     | MM | 64  | Yes ( <i>Bladder, Breast, Bone, Thyroid</i> ) | n/a | n/a |
| MMRF_2634 | c.2486G>A; p.Arg829His     | MM | n/a | n/a                                           | n/a | n/a |
| MMRC0627  | c.2875T>C; p.*959Glnext*14 | MM | n/a | n/a                                           | n/a | n/a |
| MMRC0635  | c.2875T>C; p.*959Glnext*14 | MM | n/a | n/a                                           | n/a | n/a |
| MMRC0578  | c.2875T>C; p.*959Glnext*14 | MM | n/a | n/a                                           | n/a | n/a |
| MMRF_2074 | c.2875T>C; p.*959Glnext*14 | MM | 61  | No                                            | n/a | n/a |
| MMRF_2213 | c.2875T>C; p.*959Glnext*14 | MM | 63  | Unknown                                       | n/a | n/a |
| MMRF_2253 | c.2875T>C; p.*959Glnext*14 | MM | 61  | Yes ( <i>Melanoma, Prostate, Breast</i> )     | n/a | n/a |
| MMRF_2273 | c.2875T>C; p.*959Glnext*14 | MM | 69  | Unknown                                       | n/a | n/a |
| MMRF_2557 | c.2875T>C; p.*959Glnext*14 | MM | 83  | No                                            | n/a | n/a |
| MMRF_1061 | c.2875T>C; p.*959Glnext*14 | MM | 70  | No                                            | n/a | n/a |
| MMRF_1285 | c.2875T>C; p.*959Glnext*14 | MM | 75  | Yes ( <i>Lung</i> )                           | n/a | n/a |

<sup>a</sup> For the familial cases age of inclusion in the study is given instead of age of onset

268  
269  
270  
271  
272  
273  
274  
275  
276  
277  
278  
279

**Table S3.** Selected significant GO and REACTOME categories (q-value < 0.05, NES > 0.5) enriched in carriers of *DIS3* likely deleterious variants (germline, somatic). *originalGeneSetSize*: GO/REACTOME term size from MSigDB, *actualGeneSetSize*: size of the genes from the GO/REACTOME term found in the dataset, *NES*: Normalized Enrichment Score

| <b>Germline <i>DIS3</i> mutation carriers (n=21)</b>                   |                            |                          |            |                |                                                                         |  |
|------------------------------------------------------------------------|----------------------------|--------------------------|------------|----------------|-------------------------------------------------------------------------|--|
| <b>Category</b>                                                        | <b>originalGeneSetSize</b> | <b>actualGeneSetSize</b> | <b>NES</b> | <b>q-value</b> | <b>Genes</b>                                                            |  |
| GO_CELL_CELL_ADHESION_VIA_PLASMA_MEMBRANE_ADHESION_MOLECULES           | 204                        | 191                      | 0,626      | 3,00E-06       | Protocadherin alpha gene cluster ( <i>PCDHA1-14</i> )                   |  |
| GO_OXIDATIVE_PHOSPHORYLATION                                           | 84                         | 81                       | 0,677      | 6,40E-05       | <i>NDUFV1, NDUFB5, NDUFA3, NDUFS2, NDUFS7</i>                           |  |
| GO_TRANSLATIONAL_TERMINATION                                           | 92                         | 89                       | 0,664      | 1,49E-04       | <i>MRPL34, MRPL17, MRPS25, MRPL49, MRPS30, MRPS23, MRPS12</i>           |  |
| GO_NCRNA_PROCESSING                                                    | 386                        | 360                      | 0,572      | 4,95E-03       | <i>RRS1, RPUSD2, TSEN34, TRMT12, CPSF4, IMP3, GRSF1</i>                 |  |
| GO_NCRNA_METABOLIC_PROCESS                                             | 533                        | 497                      | 0,560      | 7,70E-03       | <i>RRS1, RPUSD2, POLR2G, POLR2J, TSEN34, TRMT12, CPSF4, IMP3, GRSF1</i> |  |
| REACTOME_3_UTR_MEDIATED_TRANSLATIONAL_REGULATION                       | 176                        | 131                      | 0,612      | 2,35E-03       | <i>EIF3K, EIF3G, EIF3D, EIF3H, RPS26, RPL15, RPL17, RPL14</i>           |  |
| REACTOME_NONSENSE_MEDIATED_DECAY_ENHANCED_BY_THE_EXON_JUNCTION_COMPLEX | 176                        | 130                      | 0,603      | 1,31E-02       | <i>CASC3, RPS26, UPF3A, RPSA, RPL15, RPL14</i>                          |  |
| REACTOME_METABOLISM_OF_MRNA                                            | 284                        | 230                      | 0,571      | 4,87E-02       | <i>PSMD8, PSMC4, EXOSC7, PSMB8, NCBP2, PSMD4</i>                        |  |
| <b>Somatic <i>DIS3</i> mutation carriers (n=96)</b>                    |                            |                          |            |                |                                                                         |  |
| <b>Category</b>                                                        | <b>originalGeneSetSize</b> | <b>actualGeneSetSize</b> | <b>NES</b> | <b>q-value</b> | <b>Genes</b>                                                            |  |
| REACTOME_INTERFERON_ALPHA_BETA_SIGNALING                               | 64                         | 63                       | 0,662      | 2,00E-03       | <i>IFI6, IFIT3, OASL, IFIT1, IFIT2</i>                                  |  |
| REACTOME_PROCESSING_OF_CAPPED_INTRON_CONTAINING_PRE_MRNA               | 140                        | 132                      | 0,612      | 2,26E-03       | <i>HNRNPR, PCF11, PCBP1, HNRNPU, HNRNPC</i>                             |  |
| REACTOME_TRANSCRIPTION                                                 | 210                        | 168                      | 0,597      | 3,33E-03       | <i>PCF11, HIST2H2AC, HIST4H4, HIST2H2BE, POLR3GL</i>                    |  |
| REACTOME_MRNA_SPLICING                                                 | 111                        | 104                      | 0,620      | 5,53E-03       | <i>HNRNPR, HNRNPU, HIST2H2AC, HIST4H4, HIST1H4J, POLR3GL</i>            |  |
| REACTOME_MRNA_PROCESSING                                               | 161                        | 152                      | 0,594      | 1,37E-02       | <i>HNRNPR, HNRNPU, HNRNPC, PCF11, PCBP1</i>                             |  |

**Table S4.** Mann-Whitney-Wilcoxon Gene Set Test (MWW-GST) analysis of GO and REACTOME categories. **(a,b)** Significant GO and REACTOME categories (q-value < 0.05 and NES > 0.5) enriched in carriers of germline likely deleterious *DIS3* variants ( $n=21$ ) from the Mann-Whitney-Wilcoxon-GST enrichment analysis. **(c,d)** Significant GO and REACTOME categories (q-value < 0.05 and NES > 0.5) enriched in carriers of somatic likely deleterious *DIS3* variants ( $n=96$ ) from the Mann-Whitney-Wilcoxon-GST enrichment analysis. *originalGeneSetSize* is the GO term size from MSigDB; *actualGeneSetSize* is the size of the genes from the GO term found in the dataset; *NES* is the Normalized Enrichment Score.

*Separate file as dropbox link*

<https://www.dropbox.com/s/zoxlgg0mhqkvd2q/SupplementaryTable%20S4.xlsx?dl=0>

**Table S5.** Ranked gene list from **(a)** 21 carriers of germline likely deleterious *DIS3* variants versus 655 non-carriers and **(b)** 96 carriers of somatic likely deleterious *DIS3* variants versus 655 non-carriers. ee-MWW-score is the score associated to each gene resulting from the ee-MWW procedure. **Table S6.** Characteristics of MM cases and controls from the IMMEnSE consortium.

*Separate file as dropbox link*

<https://www.dropbox.com/s/7fjriw4k4rjhrrp/Supplementary%20Table%20S5.xlsx?dl=0>

**Table S6.** Characteristics of MM cases and controls from the IMMEnSE consortium.

|                  | <b>Cases</b> | <b>%</b>      | <b>Controls</b> | <b>%</b>      | <b>Total</b> | <b>%</b>      |
|------------------|--------------|---------------|-----------------|---------------|--------------|---------------|
| <i>Age</i>       |              |               |                 |               |              |               |
| Median           | 62           |               | 51              |               |              |               |
| 25-75 percentile | 55-68        |               | 40-63           |               |              |               |
| <i>Gender</i>    |              |               |                 |               |              |               |
| Males            | 1414         | 52.1%         | 925             | 51.8%         | 2339         | 52.3%         |
| Females          | 1302         | 47.9%         | 861             | 48.2%         | 2163         | 47.7%         |
| <b>Total</b>     | <b>2716</b>  | <b>100.0%</b> | <b>1786</b>     | <b>100.0%</b> | <b>4502</b>  | <b>100.0%</b> |
| <i>Country</i>   |              |               |                 |               |              |               |
| Italy            | 299          | 9.9%          | 231             | 12.9%         | 530          | 11.0%         |
| Poland           | 1231         | 40.8%         | 342             | 19.1%         | 1573         | 32.7%         |
| Spain            | 282          | 9.3%          | 163             | 9.1%          | 445          | 9.3%          |
| France           | 501          | 16.6%         | 176             | 9.9%          | 677          | 14.1%         |
| Portugal         | 145          | 4.8%          | 192             | 10.8%         | 337          | 7.0%          |
| Hungary          | 153          | 5.1%          | 100             | 5.6%          | 253          | 5.3%          |
| Denmark          | 300          | 9.9%          | 486             | 27.2%         | 786          | 16.4%         |
| Israel           | 109          | 3.6%          | 96              | 5.4%          | 205          | 4.3%          |
| <b>Total</b>     | <b>3020</b>  | <b>100.0%</b> | <b>1786</b>     | <b>100.0%</b> | <b>4806</b>  | <b>100.0%</b> |

*Supplementary Figures*

**Figure S1.** IGV plots and Sanger sequencing chromatograms showing the identified *DIS3* variants: **(A)** c.1755+1G>T, **(B)** c.2875T>C (p.\*959Glnext\*14) and **(C)** c.1883+1G>C. Median Variant Allele Frequency (VAF), where available, is shown for each variant.

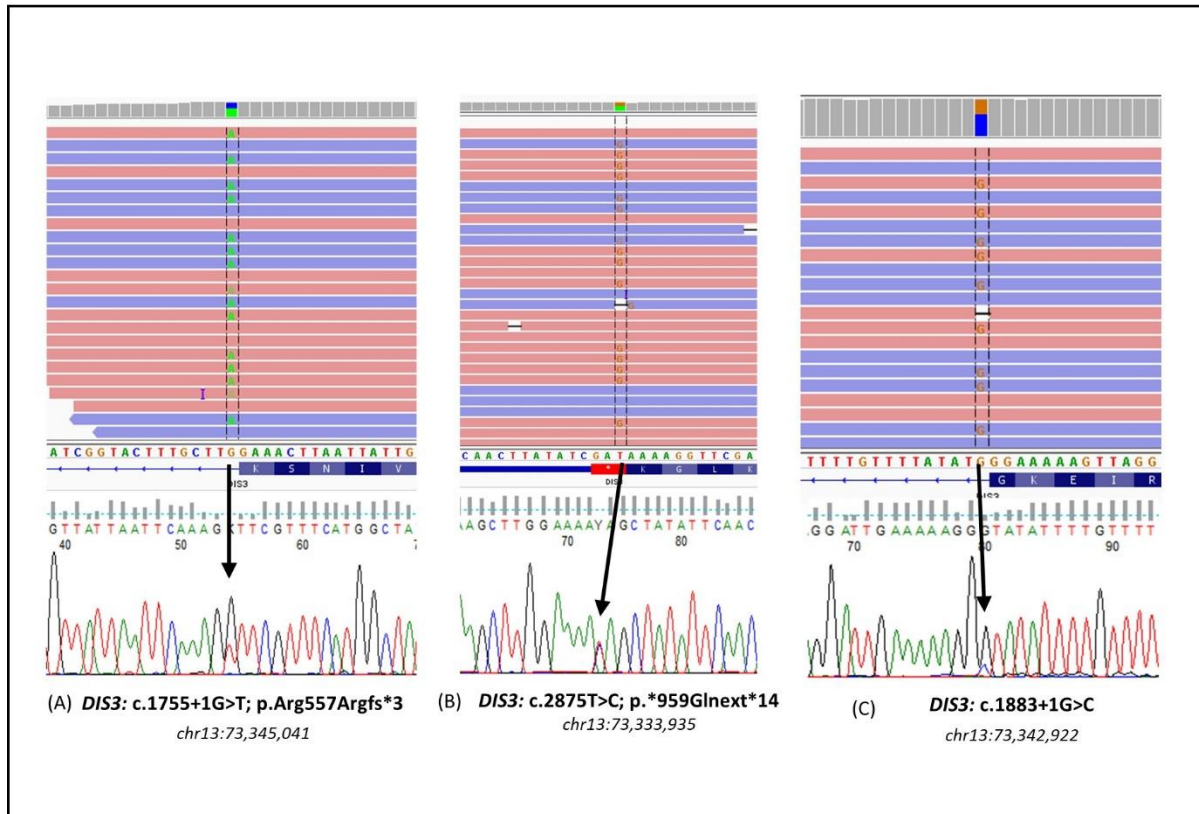

**Figure S2.** Quantile-quantile plots of gene-based burden tests for (a) rare neutral synonymous variants and (b) rare predicted deleterious variants across genes assessed by WES. Lambda statistics are shown on the plots. Logistic regression, with adjustment for ancestry inferred by genotype, was used to test for association between burden with individuals being defined as exposed if they carry one (or more) variants (synonymous or deleterious).

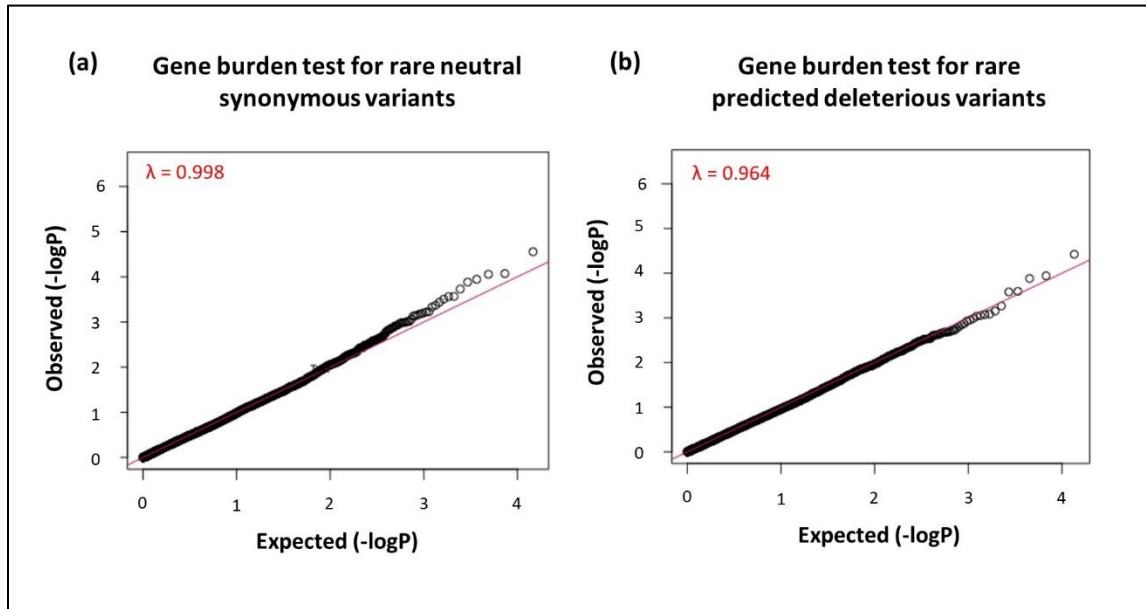



**Figure S3.** Mutation burden test and transcriptome analysis in carriers of *DIS3* variants. **(a)** Burden test association results for MM cases and controls carrying *DIS3* germline likely deleterious variants. OR is adjusted for ancestry inferred by genotype. **(b)** ee-MWW enrichment plots for selected significantly enriched GO and REACTOME pathways among carriers of germline likely deleterious *DIS3* variants (GO pathway Translational Termination, GO pathway ncRNA Processing, GO pathway ncRNA metabolic process and REACTOME pathway Metabolism of RNA). NES and q-values are indicated. Marked in red are genes involved in the respective pathways relative to other genes (in grey).

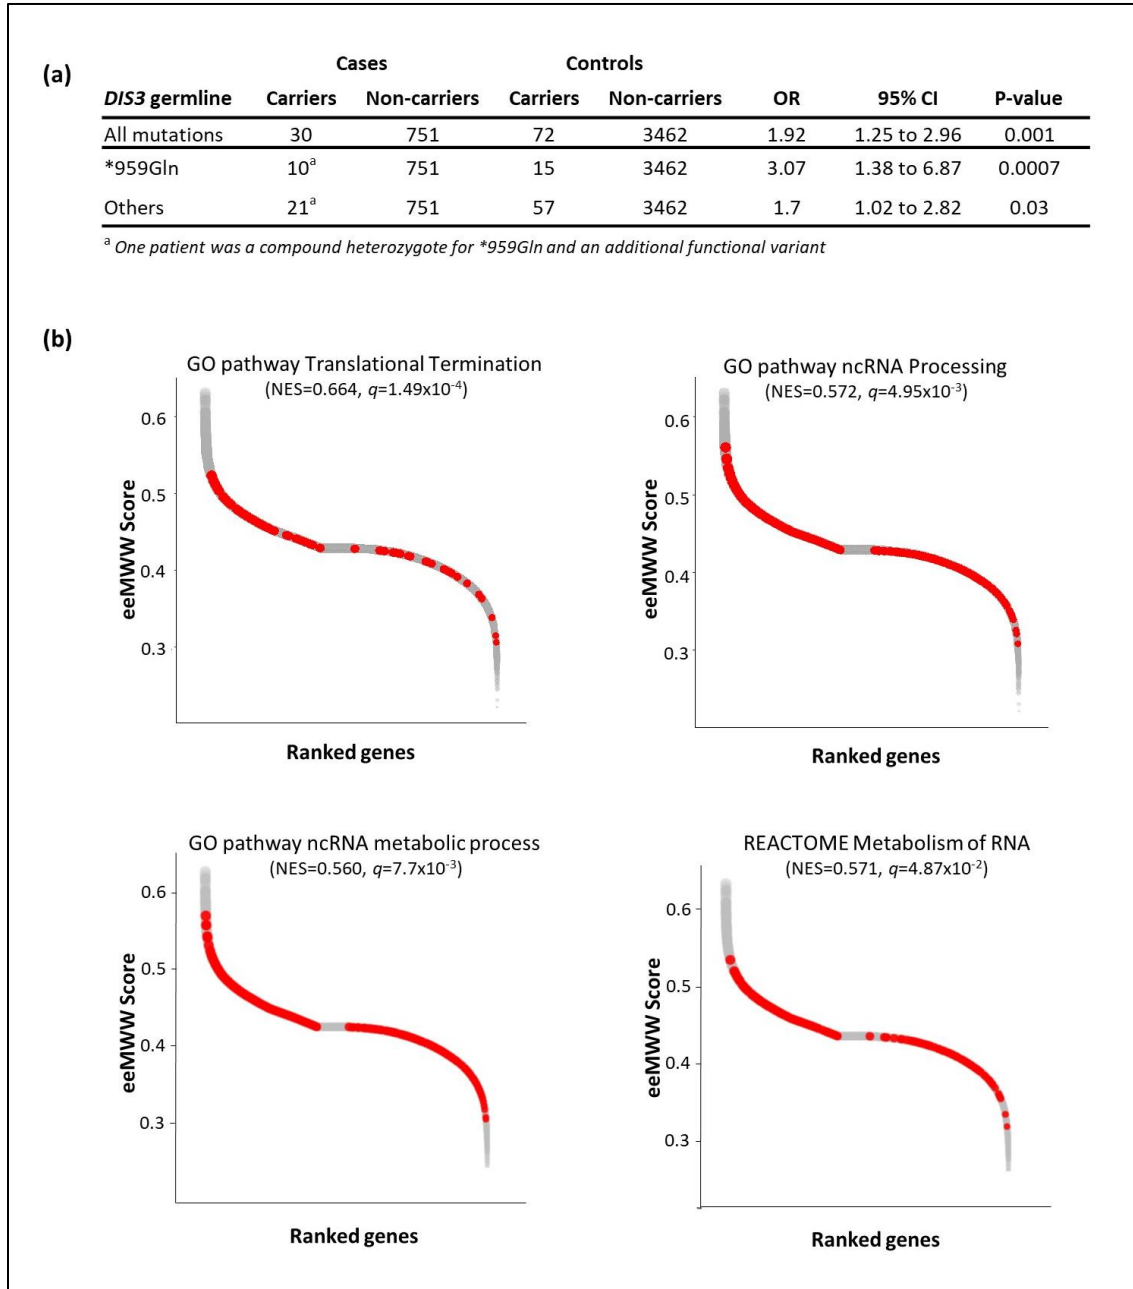

## References

- 1 Hammerschmidt W, Sugden B. Genetic analysis of immortalizing functions of Epstein-Barr virus in human B lymphocytes. *Nature* 1989; **340**: 393–7.
- 2 Li H, Durbin R. Fast and accurate short read alignment with Burrows-Wheeler transform. *Bioinformatics* 2009; **25**: 1754–1760.
- 3 McKenna A, Hanna M, Banks E, Sivachenko A, Cibulskis K, Kernytsky A *et al.* The Genome Analysis Toolkit: a MapReduce framework for analyzing next-generation DNA sequencing data. *Genome research* 2010; **20**: 1297–303.
- 4 DePristo M a., Banks E, Poplin RE, Garimella K V., Maguire JR, Hartl C *et al.* A framework for variation discovery and genotyping using next- generation DNA sequencing data. *Nat Genet* 2011; **43**: 491–498.
- 5 Van der Auwera GA, Carneiro MO, Hartl C, Poplin R, Del Angel G, Levy-Moonshine A *et al.* From FastQ data to high confidence variant calls: the Genome Analysis Toolkit best practices pipeline. *Current protocols in bioinformatics / editorial board, Andreas D Baxevanis . [et al]* 2013; **43**: 11.10.1-33.
- 6 Wang K, Li M, Hakonarson H. ANNOVAR: functional annotation of genetic variants from high-throughput sequencing data. *Nucleic acids research* 2010; **38**: e164.
- 7 Exome variant server, NHLBI GO Exome Sequencing Project (ESP). Seattle, WA. .
- 8 1000 Genomes Project Consortium, Abecasis GR, Auton A, Brooks LD, DePristo MA, Durbin RM *et al.* An integrated map of genetic variation from 1,092 human genomes. *Nature* 2012; **491**: 56–65.
- 9 Cancer Genome Atlas Research Network, Weinstein JN, Collisson E a, Mills GB, Shaw KRM, Ozenberger BA *et al.* The Cancer Genome Atlas Pan-Cancer analysis project. *Nature genetics* 2013; **45**: 1113–20.
- 10 Garrison E, Marth GT. Haplotype-based variant detection from short-read sequencing. 2012; : arXiv:1207.3907 [q-GN].

- 11 Waller RG, Darlington TM, Wei X, Madsen MJ, Thomas A, Curtin K *et al.* Novel pedigree analysis implicates DNA repair and chromatin remodeling in multiple myeloma risk. *PLoS genetics* 2018; **14**: e1007111.
- 12 Wei X, Calvo-Vidal MN, Chen S, Wu G, Revuelta M V, Sun J *et al.* Germline mutations in lysine specific demethylase 1 (LSD1/KDM1A) confer susceptibility to multiple myeloma. *Cancer research* 2018. doi:10.1158/0008-5472.CAN-17-1900.
- 13 Frattini V, Pagnotta SM, Tala, Fan JJ, Russo M V., Lee SB *et al.* A metabolic function of FGFR3-TACC3 gene fusions in cancer. *Nature* 2018; **553**: 222–227.
